# Supplementary material
Source: PubMed Central journal article supplement (PMC2756094)
Supplement: NIHMS141232-supplement-Supp1.pdf [file NIHMS141232-supplement-Supp1.pdf]

Right BNST cluster

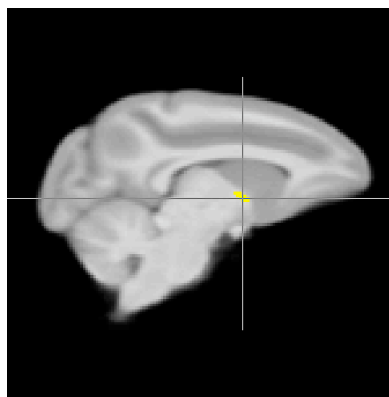

$x = 3.75$

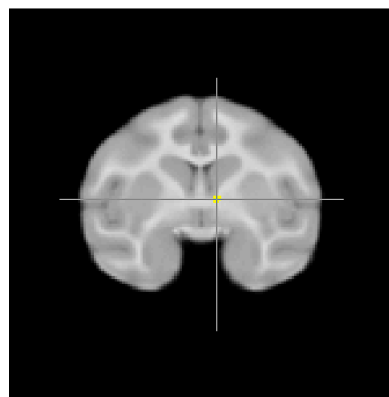

$y = 0.625$

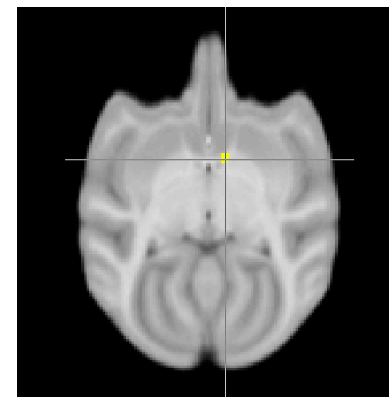

$z = 0.625$

Right amygdalohippocampal cluster

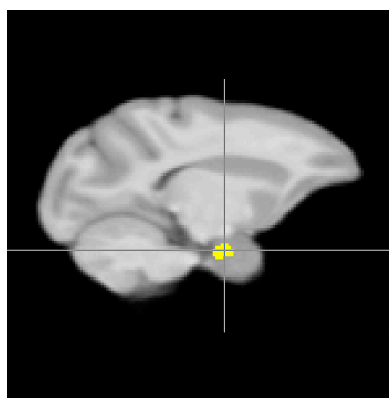

$x = 7.5$

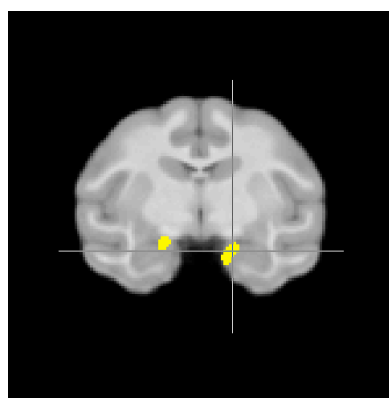

$y = -3.75$

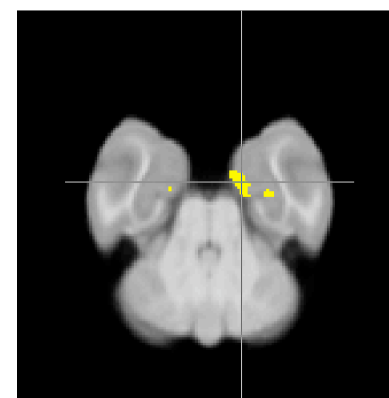

$z = -11.25$

Left amygdalohippocampal cluster

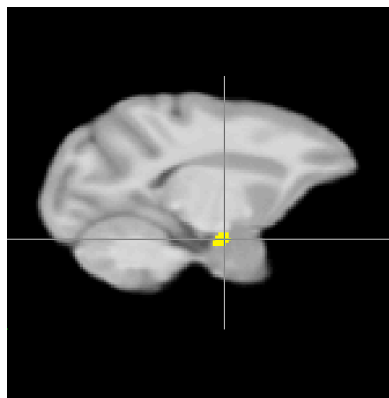

$x = -8.75$

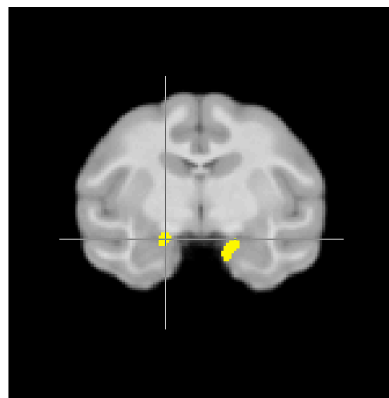

$y = -3.75$

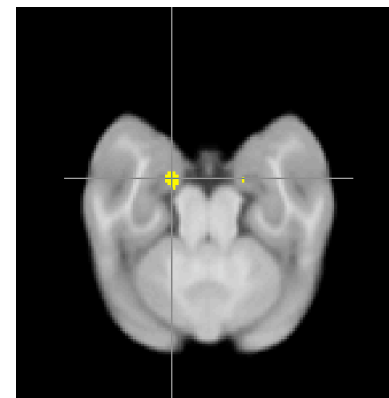

$z = -9.375$

| Regions within cluster                                                     | cluster volume<br>(in mm <sup>3</sup> ) | local maxima                                     |                |            | Location relative to anterior<br>commisure (in mm) |         |         |
|----------------------------------------------------------------------------|-----------------------------------------|--------------------------------------------------|----------------|------------|----------------------------------------------------|---------|---------|
|                                                                            |                                         | Area                                             | Max<br>t-value | Hemisphere | x                                                  | y       | z       |
| primary visual cortex (V1)                                                 | 200.93                                  | V1                                               | 4.40           | R          | 1.875                                              | -46.875 | 0       |
|                                                                            |                                         | V1                                               | 3.38           |            | 3.125                                              | -43.125 | 11.875  |
| post. hippocampus/ lat.<br>ventricle/med. pulvinar/<br>superior colliculus | 79.35                                   | post. hipp/lat. ventricle                        | 3.89           | L          | -10                                                | -20     | 3.125   |
|                                                                            |                                         | superior colliculus                              | 3.25           | R          | 1.875                                              | -14.375 | 3.125   |
|                                                                            |                                         | medial pulvinar                                  | 3.14           | L          | -3.75                                              | -13.75  | 5.625   |
| BNST/septum/<br>head of the caudate/<br>globus pallidus                    | 77.64                                   | BNST                                             | 3.33           | R          | 3.75                                               | 0.625   | 3.125   |
|                                                                            |                                         | septum                                           | 3.32           | L          | -1.25                                              | 0.625   | 8.125   |
|                                                                            |                                         | caudate                                          | 3.16           | R          | 6.25                                               | -4.375  | 7.5     |
|                                                                            |                                         | globus pallidus                                  | 3.16           | L          | -5.625                                             | -1.875  | -0.625  |
| post. hippocampus/<br>lateral ventricle                                    | 38.09                                   | post. hipp/lat. ventricle                        | 4.42           | R          | 11.25                                              | -18.75  | 3.125   |
| amygdala /<br>anterior hippocampus                                         | 32.47                                   | amygdalohippocampal<br>area                      | 3.59           | R          | 5                                                  | -2.5    | -13.125 |
| amygdala /<br>anterior hippocampus                                         | 31.49                                   | hippocampus/amgdalo-<br>striatal transition zone | 3.95           | L          | -12.5                                              | -6.875  | -8.75   |
| caudate                                                                    | 17.58                                   | caudate                                          | 3.29           | L          | -7.5                                               | -5      | 8.75    |
| corpus callosum                                                            | 12.45                                   | corpus callosum                                  | 3.41           | L          | -5                                                 | 8.75    | 10      |
| caudate                                                                    | 7.08                                    | caudate                                          | 3.31           | L          | -6.875                                             | 8.125   | 5       |
| hippocampus                                                                | 5.13                                    | hippocampus                                      | 3.31           | R          | 15.625                                             | -5      | -13.75  |

Table S2.

| 5-HTT availability correlations with ALN glucose metabolism |            |             |                | n=34    | coordinates (relative to AC) |        |  |
|-------------------------------------------------------------|------------|-------------|----------------|---------|------------------------------|--------|--|
| Brain Region                                                | hemisphere | Pearson's r | p (two-tailed) | x       | y                            | z      |  |
| amygdalohippocampal area                                    | left       | 0.255       | 0.146          | -8.75   | -3.75                        | -9.375 |  |
| BNST                                                        | left       | 0.199       | 0.260          | -3.75   | -0.625                       | 1.875  |  |
| hippocampus                                                 | left       | 0.219       | 0.213          | -14.375 | -7.5                         | -10    |  |
| genu of corpus callosum                                     | midline    | 0.456       | 0.007          | 0       | 10.625                       | 6.875  |  |
| amygdalohippocampal area                                    | right      | 0.413       | 0.015          | 7.5     | -3.75                        | -11.25 |  |
| BNST                                                        | right      | 0.318       | 0.067          | 3.75    | 0.625                        | 0.625  |  |
| hippocampus                                                 | right      | 0.086       | 0.629          | 13.75   | -6.875                       | -11.25 |  |

Total variance in anxious temperament  
 accounted for by **FDG<sub>(ALN)</sub>** and **5-HTT** coordinates (relative to AC)

Table S3.

| Brain Region             | hemisphere | R <sup>2</sup> | F      | p      | x       | y      | z      |
|--------------------------|------------|----------------|--------|--------|---------|--------|--------|
| amygdalohippocampal area | left       | 0.377          | 9.390  | 0.001  | -8.75   | -3.75  | -9.375 |
| BNST                     | left       | 0.378          | 9.413  | 0.001  | -3.75   | -0.625 | 1.875  |
| hippocampus              | left       | 0.354          | 8.509  | 0.001  | -14.375 | -7.5   | -10    |
| genu of corpus callosum  | midline    | 0.362          | 8.809  | 0.001  | 0       | 10.625 | 6.875  |
| amygdalohippocampal area | right      | 0.395          | 10.103 | 0.0004 | 7.5     | -3.75  | -11.25 |
| BNST                     | right      | 0.369          | 9.055  | 0.001  | 3.75    | 0.625  | 0.625  |
| hippocampus              | right      | 0.457          | 13.031 | 0.0001 | 13.75   | -6.875 | -11.25 |

## **Supplemental Figure Captions**

**Figure S1.** Availability of 5-HTT in the amygdalohippocampal area and bed nucleus of the stria terminalis (BNST) is positively correlated with individual differences in the anxious temperament composite (yellow). The images correspond to the clusters shown in Figure 1 in the main text.

## **Supplemental Table Captions**

### **Table S1.**

Clusters where anxious temperament was significantly ( $p = 0.005$ , uncorrected) correlated with 5-HTT availability measured with DASB-PET imaging. All clusters were positively correlated with anxious temperament. Anatomical regions and local maxima within each cluster are presented. Voxelwise analyses controlled for any effects of age, gray matter probability and DASB injection mass.

**Table S2.** Bivariate correlations between mean 5-HTT binding and FDG-PET values. Mean 5-HTT values were extracted from each brain region of interest, and residualized for the effects of age, gray matter probability and DASB injection mass. Mean FDG values were extracted from each brain region of interest, and residualized for the effects of age and gray matter probability. The FDG values were taken from the ALN component of the behavioral paradigm, and therefore represent glucose metabolism in response to a social separation.

**Table S3.** Results of multiple linear regression analyses used to determine the amount of variance in anxious temperament accounted for by the mean 5-HTT availability and FDG metabolism within each cluster. The FDG values were taken from the ALN component of the

behavioral paradigm, and therefore represent glucose metabolism in response to a social separation.
